# Supplementary material
Source: MDPI journal article supplement (https://www.mdpi.com/2073-445X/11/12/2187)
Supplement: s1 [file s1]

# Evaluating biophysical conservation practices with dynamic land use and land cover in the highlands of Ethiopia

Meseret B. Addisie <sup>1</sup>, Gashaw Molla <sup>2</sup>, Menberu Teshome <sup>3</sup>, Gebiaw T. Ayele <sup>4,\*</sup>

## Supplementary material

Table S1: Types of sensor used, acquisition date and percent cloud cover

| Acquisition date | Sensor             | Spatial resolution | Path/row | Cloud cover |
|------------------|--------------------|--------------------|----------|-------------|
| 05-Feb-2020      | Landsat 8 OLI TIRS | 30m                | 169/051  | 0.00        |
|                  |                    |                    | 169/052  | 0.17        |
| 08-Mar-2005      | Landsat 7 ETM+     | 30m                | 169/051  | 0.00        |
|                  |                    |                    | 169/052  | 0.00        |
| 12-Feb-1990      | Landsat 5 ETM      | 30m                | 169/051  | 0.00        |
|                  |                    |                    | 169/052  | 0.00        |

Table S2: Land use classes and accuracy assessment results (1999-2020)

| Land Use Class                    | Reference Totals | Classified Totals | Number Correct | Producers Accuracy (%)                 | Users Accuracy (%) | Kappa |
|-----------------------------------|------------------|-------------------|----------------|----------------------------------------|--------------------|-------|
| 2020                              | Water body       | 22                | 22             | 100                                    | 100                | 1     |
|                                   | Forest           | 27                | 27             | 100                                    | 100                | 1     |
|                                   | Cultivated land  | 49                | 52             | 100                                    | 94.2               | 0.92  |
|                                   | Grazing land     | 36                | 35             | 97.2                                   | 100                | 1     |
|                                   | Built-up area    | 23                | 21             | 91.3                                   | 100                | 1     |
|                                   | Total            | 157               | 157            | 154                                    |                    |       |
| Overall Classification Accuracy = |                  |                   |                | <b>98.1%</b>                           |                    |       |
|                                   |                  |                   |                | Overall Kappa Statistics = <b>0.98</b> |                    |       |
| 2005                              | Water body       | 24                | 22             | 91.7                                   | 100                | 1     |
|                                   | Forest           | 31                | 31             | 96.8                                   | 96.8               | 0.96  |
|                                   | Cultivated land  | 50                | 53             | 100                                    | 94.3               | 0.92  |
|                                   | Grazing land     | 35                | 36             | 97.1                                   | 94.5               | 0.93  |
|                                   | Built-up area    | 35                | 33             | 91.4                                   | 96                 | 0.96  |
|                                   | Total            | 175               | 175            | 168                                    |                    |       |
| Overall Classification Accuracy = |                  |                   |                | <b>96%</b>                             |                    |       |
|                                   |                  |                   |                | Overall Kappa Statistics = <b>0.95</b> |                    |       |
| 199                               | Water body       | 20                | 19             | 95                                     | 100                | 1     |
|                                   | Forest           | 46                | 46             | 97.8                                   | 97.8               | 0.97  |

|                                                |     |     |     |      |      |      |
|------------------------------------------------|-----|-----|-----|------|------|------|
| Cultivated land                                | 60  | 64  | 60  | 100  | 93.6 | 0.91 |
| Grazing land                                   | 55  | 53  | 53  | 96.4 | 100  | 1    |
| Built-up area                                  | 28  | 27  | 27  | 96.4 | 100  | 1    |
| Total                                          | 209 | 209 | 204 |      |      |      |
| Overall Classification Accuracy = <b>97.6%</b> |     |     |     |      |      |      |
| Overall Kappa Statistics = <b>0.97%</b>        |     |     |     |      |      |      |
